# Supplementary material
Source: Research Square preprint supplement (doi:10.21203/rs.3.rs-9579201/v1)
Supplement: Supplementary file 1 [file 5fd33a827d239168c49a009d.docx]

| **Taxa** | **n** | **Isolation frequency (%)** | **Site** | **GenBank accession numbers** |
| --- | --- | --- | --- | --- |
| *Linnemannia gamsii* | 10 | 29.41 | P−, P+ | PZ144615, PZ144621, PZ144625, PZ144627, PZ144632, PZ144634, PZ144635, PZ144636, PZ144638, PZ144639 |
| *Fusarium sp2*  *(affinity to F. solani)* | 6 | 17.65 | P−, P+ | PZ144614, PX647591, PZ144618, PZ144623, PZ144640, PZ144641 |
| *Clonostachys sp.*  *(affinity to C. rosea and C. solani)* | 5 | 14.71 | P+, P− | PX652422, PZ144628, PZ144637, PZ144642, PZ144643 |
| *Linnemannia hyalina* | 5 | 14.71 | P+, P− | PZ144616, PZ144617, PZ144624, PZ144631, PZ144633 |
| *Thyridium ripperae* | 2 | 5.88 | P−, P+ | PZ144619, PZ144620 |
| *Cylindrodendrum alicantinum* | 1 | 2.94 | P+ | PZ144644 |
| *Entomortierella parvispora* | 1 | 2.94 | P− | PZ144626 |
| *Fusarium sp1*  *(affinity to F. iranicum* | 1 | 2.94 | P− | PZ144622 |
| *Mortierella sp.*  *(affinity to A. amoeboidea)* | 1 | 2.94 | P− | PZ144630 |
| *Mucor laxorrhizus* | 1 | 2.94 | P+ | PZ144645 |
| *Podila humilis* | 1 | 2.94 | P+ | PZ144629 |

Supplementary Tables

**Table S2**. Fungal isolates found in the seeds
