# Supplementary material
Source: Research Square preprint supplement (doi:10.21203/rs.3.rs-9579201/v1)
Supplement: Supplementary file 2 [file df28ff608bc675a6326a8d2d.xlsx]

## Sheet: Sheet1
Morphotype	Isolate	Name on plate	species Name
M01	B39-02	SOD C05	Graphium basitruncatum
M03	B48-02	SOR-OAK G01	Clonostachys sp. (affinity to C. rosea and C. solani)
M04	B83-01		No reliable identification (Below quality thresholds)
M04	B83-01b	SOR-OAK H01	Clonostachys sp. (affinity to C. rosea and C. solani)
M04	B15-03	SOD F09	Clonostachys sp. (affinity to C. rosea and C. solani)
M05	B54-02	SOD A12	No reliable identification (Below quality thresholds)
M06	B30-03	SOD E12	Akanthomyces muscarius
M06	B52-04	SOD E05	Mucor laxorrhizus
M06	B34-01	SOD F05	Aspergillus sp. (Affinity to A. tennesseensis, A. sydowii, A. versicolor and A. jensenii)
M06	B38-05	SOD G05	No reliable identification (Below quality thresholds)
M08	B66-02	SOD A06	No reliable identification (Below quality thresholds)
M09	B02-02	SOD B06	Mucor laxorrhizus
M09	B83-04	SOR-OAK A02	Clonostachys sp. (affinity to C. rosea and C. solani)
M10	B54-03	SOD C06	Clonostachys sp. (affinity to C. rosea and C. solani)
M10	B10-02	SOD B12	Cephalotrichum hinnuleum
M10	B07-03	SOD D06	Aspergillus sp. (Affinity to A. tennesseensis, A. sydowii, A. versicolor and A. jensenii)
M11	B45-04	SOD H12	Mucor hiemalis f. hiemalis
M11	B61-04	SOR-OAK D01	No reliable identification (Below quality thresholds)
M12	B10-01	SOD G11	Mucor aseptatophorus
M12	B70-02	SOD E06	Podila humilis
M14	B87-02	SOR-OAK B02	Pseudowardomyces humicola
M14	B83-03	SOD F06	Clonostachys sp. (affinity to C. rosea and C. solani)
M14	B18-04	SOD G06	Mucor moelleri
M15	B26-03	SOD H06	Metapochonia bulbillosa
M15	B81-01	SOR-OAK C02	Aspergillus sp. (Affinity to A. tennesseensis, A. sydowii, A. versicolor and A. jensenii)
M16	B05-04	SOD C12	Clonostachys sp. (affinity to C. rosea and C. solani)
M16	B46-01	SOR-OAK D02	Chlamydoabsidia padenii
M16	B76-05	SOD C07	Chlamydoabsidia padenii
M17	B62-05	SOR-OAK E02	Aspergillus sp. (Affinity to A. tennesseensis, A. sydowii, A. versicolor and A. jensenii)
M17	B42-04	SOD D07	Metapochonia cordycipiticonsociata
M18	B21-02	SOD H11	Cephalotrichum nanum
M18	B56-04	SOD E07	Metapochonia cordycipiticonsociata
M18	B35-02	SOR-OAK B01	Metapochonia bulbillosa
M20	B43-05	SOD F07	Mucor racemosus f. racemosus
M21	B59-01	SOD G07	Clonostachys sp. (affinity to C. rosea and C. solani)
M21	B08-01	SOD A07	Aspergillus sp. (Affinity to A. tennesseensis, A. sydowii, A. versicolor and A. jensenii)
M21	B17-03	SOD A08	No reliable identification (Below quality thresholds)
M22	B67-03	SOD B08	Clonostachys sp. (affinity to C. rosea and C. solani)
M22	B07-01	SOD C08	Clonostachys sp. (affinity to C. rosea and C. solani)
M22	B45-03	SOD D08	Diaporthe eres
M23	B25-02	SOR-OAK A01	Metapochonia bulbillosa
M23	B57-05	SOD E08	Mucor hiemalis f. hiemalis
M23	B85-02	SOD F08	No reliable identification (Below quality thresholds)
M24	B14-3	SOR-OAK E01	Lecanicillium praecognitum
M24	B33-01	SOD G08	Metapochonia bulbillosa
M24	B20-03	SOR-OAK F01	No reliable identification (Below quality thresholds)
M24	B06-02	SOD H08	Metapochonia bulbillosa
M24	B18-02	SOD A09	Mucor moelleri
M25	B44-04	SOD B09	Clonostachys sp. (affinity to C. rosea and C. solani)
M25	B88-03	SOD D09	Entomortierella parvispora
M26	B44-03	SOD E09	Aspergillus sp. (Affinity to A. tennesseensis, A. sydowii, A. versicolor and A. jensenii)
M26	B89-04	SOD D12	No reliable identification (Below quality thresholds)
M27	B38-03	SOD B07	No reliable identification (Below quality thresholds)
M27	B57-02	SOD G09	Metapochonia bulbillosa
M29	B38-04	SOD H09	Metapochonia bulbillosa
M29	B69-05	SOD A10	No reliable identification (Below quality thresholds)
M30	B72-02	SOD C09	Clonostachys sp. (affinity to C. rosea and C. solani)
M31	B88-01	SOD C10	Clonostachys sp. (affinity to C. rosea and C. solani)
M32	B22-04	SOD D10	Clonostachys sp. (affinity to C. rosea and C. solani)
M32	B11-07	SOD B10	Aspergillus sp. (Affinity to A. tenesseensis, A. sydowii, A. versicolor and A. jensenii)
M33	B58-02	SOD H05	Clonostachys sp. (affinity to C. rosea and C. solani)
M34	B01-03	SOD F12	Clonostachys sp. (affinity to C. rosea and C. solani)
M34	B24-01	SOD G12	Metapochonia bulbillosa
M35	B28-01	SOD E10	Metapochonia bulbillosa
M35	B24-02	SOD F10	Metapochonia bulbillosa
M36	B13-01	SOD G10	Entomortierella parvispora
M36	B15-01	SOD H10	Metapochonia bulbillosa
M37	B03-02	SOR-OAK C01	Clonostachys sp. (affinity to C. rosea and C. solani)
M37	B05-01	SOD A11	Clonostachys sp. (affinity to C. rosea and C. solani)
S	B73-03	SOD B11	No reliable identification (Below quality thresholds)
S	B40-04	SOD C11	Clonostachys sp. (affinity to C. rosea and C. solani)
S	B80-02	SOD D11	Clonostachys sp. (affinity to C. rosea and C. solani)
S	B05-02	SOD E11	Graphium basitruncatum
