# Supplementary material
Source: Research Square preprint supplement (doi:10.21203/rs.3.rs-9579201/v1)
Supplement: Supplementary file 2 [file eab0e766d25eb3149774972e.docx]

| **Taxa** | **n** | **Isolation frequency (%)** |
| --- | --- | --- |
| *Clonostachys sp. (affinity to C. rosea and C. solani)* | 20 | 32.79 |
| *Metapochonia bulbillosa* | 11 | 18.03 |
| *Aspergillus sp. (affinity to A. tenesseensis,*  *A. sydowii, A. versicolor and A. jensenii)* | 7 | 11.48 |
| *Chlamydoabsidia padenii* | 2 | 3.28 |
| *Entomortierella parvispora* | 2 | 3.28 |
| *Graphium basitruncatum* | 2 | 3.28 |
| *Metapochonia cordycipiticonsociata* | 2 | 3.28 |
| *Mucor hiemalis f. hiemalis* | 2 | 3.28 |
| *Mucor laxorrhizus* | 2 | 3.28 |
| *Mucor moelleri* | 2 | 3.28 |
| *Akanthomyces muscarius* | 1 | 1.64 |
| *Cephalotrichum hinnuleum* | 1 | 1.64 |
| *Cephalotrichum nanum* | 1 | 1.64 |
| *Diaporthe eres* | 1 | 1.64 |
| *Lecanicillium praecognitum* | 1 | 1.64 |
| *Mucor aseptatophorus* | 1 | 1.64 |
| *Mucor racemosus f. racemosus* | 1 | 1.64 |
| *Podila humilis* | 1 | 1.64 |
| *Pseudowardomyces humicola* | 1 | 1.64 |

Table S1. Fungal taxa isolated from beech seedlings, showing isolate counts (n) and relative isolation frequencies
