# Supplementary material
Source: Research Square preprint supplement (doi:10.21203/rs.3.rs-9579201/v1)
Supplement: Supplementary file 3 [file fc4f7566123abcb769c4ff7d.docx]

**Supplementary table 1:** List of fungal species recovered from seeds and seedlings and their associated GenBank accession numbers.

| **Species** | **Accession number** | **Recovered from** |
| --- | --- | --- |
| *Absidia virescens* | PZ344529 | Seedlings |
| *Akanthomyces muscarius* | PZ345339 | Seedlings |
| *Arthropsis truncata* | PZ144620 | Seed |
| *Aspergillus jensenii* | PZ345340 | Seedlings |
| *Aspergillus tennesseensis* | PZ345666 | Seedlings |
| *Aspergillus versicolor* | PZ345674 | Seedlings |
| *Cephalotrichum hinnuleum* | PZ345341 | Seedlings |
| *Cephalotrichum nanum* | PZ345668 | Seedlings |
| *Clonostachys eriocamporesiana* | PZ345671 | Seedlings |
| *Clonostachys rosea* f. *catenulata* | PZ144628 | Seed |
| *Clonostachys solani* f. *nigrovirens* | PX652422 | Seed |
| *Cylindrodendrum alicantinum* | PZ144644 | Seed |
| *Diaporthe biguttusis* | PZ345672 | Seedlings |
| *Entomortierella parvispora* | PZ144626 | Seed |
| *Entomortierella sugadairana* | PZ344532 | Seedlings |
| *Fusarium ambrosium* | PX647591 | Seed |
| *Fusarium iranicum* | PZ144622 | Seed |
| *Fusarium ngaiotongaense* | PZ144623 | Seed |
| *Fusarium perseae* | PZ144614 | Seed |
| *Graphium basitruncatum* | PZ345675 | Seedlings |
| *Graphium jumulu* | PX629144 | Seedlings |
| *Lecanicillium praecognitum* | PZ345673 | Seedlings |
| *Linnemannia gamsii* | PZ144621 | Seed |
| *Linnemannia hyalina* | PZ144615 | Seed |
| *Metapochonia bulbillosa* | PZ345665 | Seedlings |
| *Metapochonia rubescens* | PZ345667 | Seedlings |
| *Mortierella* sp. | PZ144630 | Seed |
| *Mortierella rostafinskii* | PZ345676 | Seedlings |
| *Mucor aseptatophorus* | PZ345662 | Seedlings |
| *Mucor hiemalis* f. *hiemalis* | PZ345342 | Seedlings |
| *Mucor laxorrhizus* | PZ144645 | Seed |
| *Mucor moelleri* | PZ345664 | Seedlings |
| *Mucor racemosus* f. *racemosus* | PZ345669 | Seedlings |
| *Podila humilis* | PZ144629 | Seed |
| *Thyridium flavostromatum* | PZ144619 | Seed |
| *Wardomyces humicola* | PZ345663 | Seedlings |
