# Supplementary material
Source: Research Square preprint supplement (doi:10.21203/rs.3.rs-9579201/v1)
Supplement: Supplementary file 4 [file f8b8367896b450a2afafb8ed.xlsx]

## Sheet: Hoja1
Samples	Code	Species name	Material	Host	Location	Primers used	Phythophthora area	Internal code	Secuence deposited in Genbank	Genbank accesion number
01P(-)01	S_1	Fusarium sp. 2	Seeds	Fagus sylvatica	Soderasen National Park, Scania, Sweden	ITS4-6	Negative	SOD A01	ITS6	PZ144614
01P(-)02	S_2	Fusarium sp. 2	Seeds	Fagus sylvatica	Soderasen National Park, Scania, Sweden	ITS4-6	Negative	SOD B01	ITS6	PX647591
01P(-)04	S_3	Linnemannia gamsii	Seeds	Fagus sylvatica	Soderasen National Park, Scania, Sweden	ITS4-6	Negative	SOD C01	ITS4	PZ144615
01P(+)02	S_4	Clonostachys sp.	Seeds	Fagus sylvatica	Soderasen National Park, Scania, Sweden	ITS4-6	Positive	SOD D01	ITS4	PX652422
01P(+)03	S_5	Linnemannia hyalina	Seeds	Fagus sylvatica	Soderasen National Park, Scania, Sweden	ITS4-6	Positive	SOD E01	ITS6	PZ144616
01P(+)05	S_6	Linnemannia hyalina	Seeds	Fagus sylvatica	Soderasen National Park, Scania, Sweden	ITS4-6	Positive	SOD F01	ITS6	PZ144617
02P(-)02	S_7	Fusarium sp. 2	Seeds	Fagus sylvatica	Soderasen National Park, Scania, Sweden	ITS4-6	Negative	SOD G01	ITS4	PZ144618
02P(-)-03	S_8	Thyridium ripperae	Seeds	Fagus sylvatica	Soderasen National Park, Scania, Sweden	ITS4-6	Negative	SOD H01	ITS6	PZ144619
02P(+)-01	S_9	Thyridium ripperae	Seeds	Fagus sylvatica	Soderasen National Park, Scania, Sweden	ITS4-6	Positive	SOD A02	ITS4	PZ144620
03P(-)-02	S_10	Linnemannia gamsii	Seeds	Fagus sylvatica	Soderasen National Park, Scania, Sweden	ITS4-6	Negative	SOD B02	ITS6	PZ144621
03P(-)-03	S_11	Fusarium sp. 1	Seeds	Fagus sylvatica	Soderasen National Park, Scania, Sweden	ITS4-6	Negative	SOD C02	ITS4	PZ144622
05P(-)-01	S_12	Fusarium sp. 2	Seeds	Fagus sylvatica	Soderasen National Park, Scania, Sweden	ITS4-6	Negative	SOD D02	ITS6	PZ144623
05P(-)-03	S_13	Linnemannia hyalina	Seeds	Fagus sylvatica	Soderasen National Park, Scania, Sweden	ITS4-6	Negative	SOD E02	ITS4	PZ144624
06P(-)-02	S_14	Linnemannia gamsii	Seeds	Fagus sylvatica	Soderasen National Park, Scania, Sweden	ITS4-6	Negative	SOD F02	ITS6	PZ144625
06P(-)-03	S_15	Entomortierella parvispora	Seeds	Fagus sylvatica	Soderasen National Park, Scania, Sweden	ITS4-6	Negative	SOD G02	ITS4	PZ144626
07P(-)-02	S_17	Linnemannia gamsii	Seeds	Fagus sylvatica	Soderasen National Park, Scania, Sweden	ITS4-6	Negative	SOD A03	ITS6	PZ144627
07P(-)-03	S_18	Clonostachys sp.	Seeds	Fagus sylvatica	Soderasen National Park, Scania, Sweden	ITS4-6	Negative	SOD B03	ITS6	PZ144628
07P(+)-01	S_19	Podila humilis	Seeds	Fagus sylvatica	Soderasen National Park, Scania, Sweden	ITS4-6	Positive	SOD C03	ITS6	PZ144629
08P(-)-01	S_20	Mortierella sp.	Seeds	Fagus sylvatica	Soderasen National Park, Scania, Sweden	ITS4-6	Negative	SOD D03	ITS6	PZ144630
08P(-)-03	S_21	Linnemannia hyalina	Seeds	Fagus sylvatica	Soderasen National Park, Scania, Sweden	ITS4-6	Negative	SOD E03	ITS6	PZ144631
08P(+)-01	S_22	Fusarium sp. 2	Seeds	Fagus sylvatica	Soderasen National Park, Scania, Sweden	ITS4-6	Positive	SOD F03	ITS6	PZ144632
08P(+)-03	S_23	Linnemannia hyalina	Seeds	Fagus sylvatica	Soderasen National Park, Scania, Sweden	ITS4-6	Positive	SOD G03	ITS4	PZ144633
09P(+)-01	S_24	Linnemannia gamsii	Seeds	Fagus sylvatica	Soderasen National Park, Scania, Sweden	ITS4-6	Positive	SOD H03	ITS6	PZ144634
09P(+)-02	S_25	Linnemannia gamsii	Seeds	Fagus sylvatica	Soderasen National Park, Scania, Sweden	ITS4-6	Positive	SOD A04	ITS6	PZ144635
11P(-)-03	S_26	Fusarium sp. 2	Seeds	Fagus sylvatica	Soderasen National Park, Scania, Sweden	ITS4-6	Negative	SOD B04	ITS6	PZ144636
11P(+)-01	S_27	Clonostachys sp.	Seeds	Fagus sylvatica	Soderasen National Park, Scania, Sweden	ITS4-6	Positive	SOD C04	ITS4	PZ144637
12P(-)-01	S_28	Linnemannia gamsii	Seeds	Fagus sylvatica	Soderasen National Park, Scania, Sweden	ITS4-6	Negative	SOD D04	ITS6	PZ144638
12P(-)-02	S_16	Linnemannia gamsii	Seeds	Fagus sylvatica	Soderasen National Park, Scania, Sweden	ITS4-6	Negative	SOD H02	ITS6	PZ144639
12P(-)-03	S_29	Linnemannia gamsii	Seeds	Fagus sylvatica	Soderasen National Park, Scania, Sweden	ITS4-6	Negative	SOD E04	ITS6	PZ144640
13P(-)-02	S_30	Linnemannia gamsii	Seeds	Fagus sylvatica	Soderasen National Park, Scania, Sweden	ITS4-6	Negative	SOD F04	ITS4	PZ144641
13P(+)-03	S_31	Clonostachys sp.	Seeds	Fagus sylvatica	Soderasen National Park, Scania, Sweden	ITS4-6	Positive	SOD G04	ITS4	PZ144642
14P(-)-01	S_32	Clonostachys sp.	Seeds	Fagus sylvatica	Soderasen National Park, Scania, Sweden	ITS4-6	Negative	SOD H04	ITS4	PZ144643
15P(+)-02	S_33	Cylindrodendrum alicantinum	Seeds	Fagus sylvatica	Soderasen National Park, Scania, Sweden	ITS4-6	Positive	SOD A05	ITS6	PZ144644
15P(+)-04	S_34	Mucor laxorrhizus	Seeds	Fagus sylvatica	Soderasen National Park, Scania, Sweden	ITS4-6	Positive	SOD B05	ITS6	PZ144645
